# Supplementary material
Source: publisher figshare collection journal article supplement (https://brill.figshare.com/articles/dataset/_/27878037)
Supplement: Supplementary file 1 [file 2]

**Altitudes differences impact gene expression and accumulation of main medicinal ingredients of *Zanthoxylum planispinum* var. *Dintanensis* in rocky desertification control areas**

*Jiyue Wang, Zhenghong Liu, Yanghua Yu, Shanggao Liao, Zele Peng and Xiaosheng Yang*

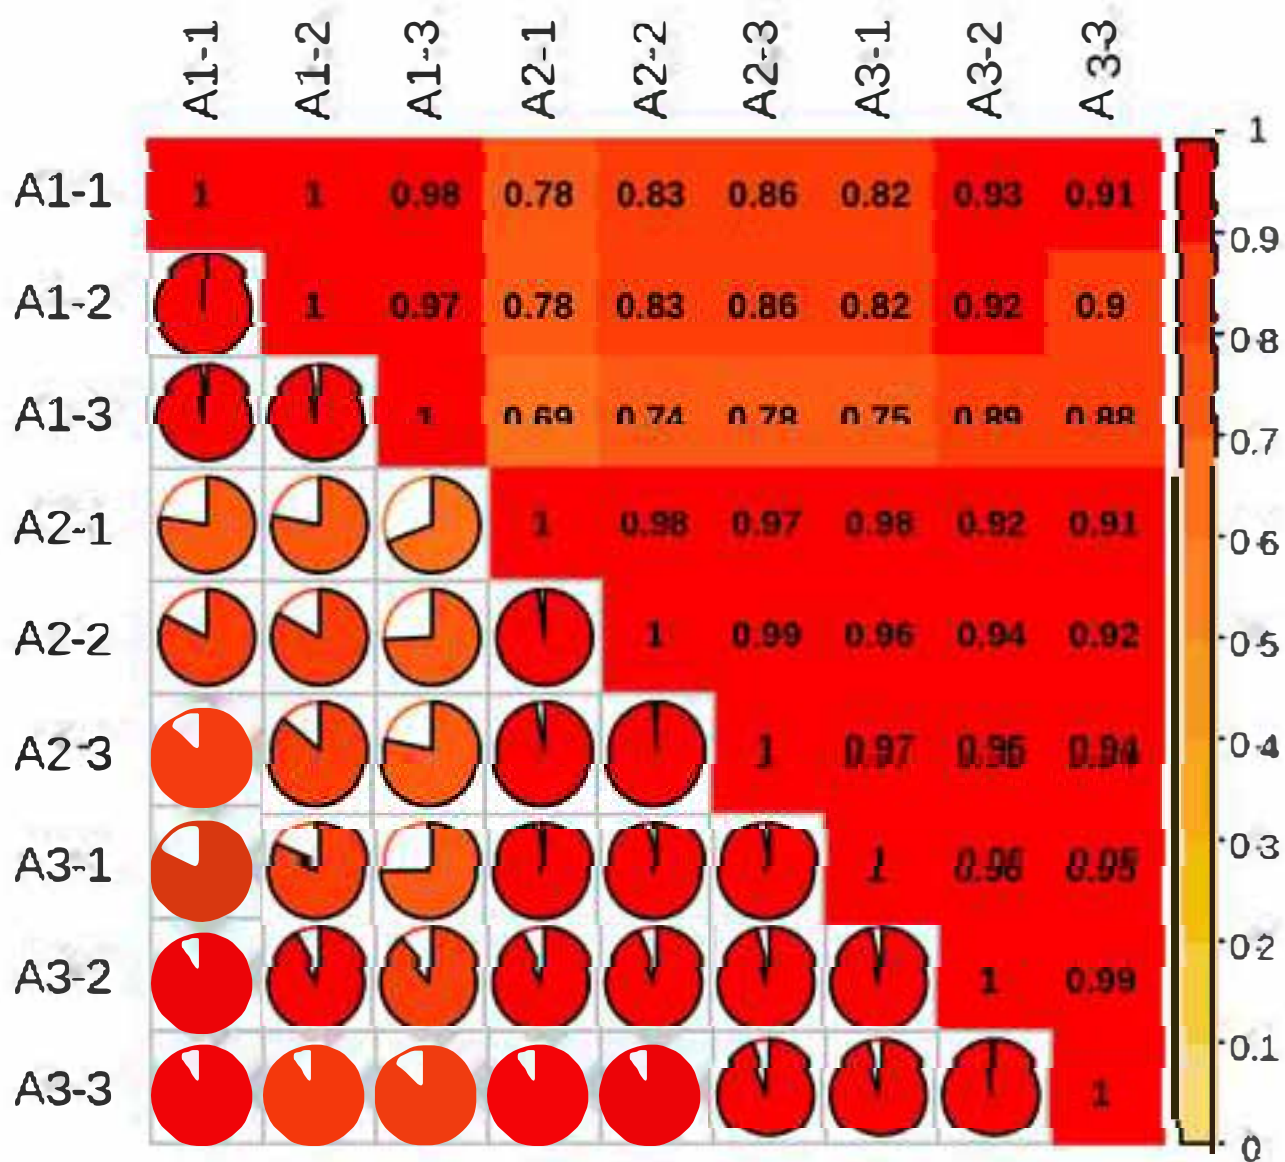

Figure S1. Correlation analysis between samples.

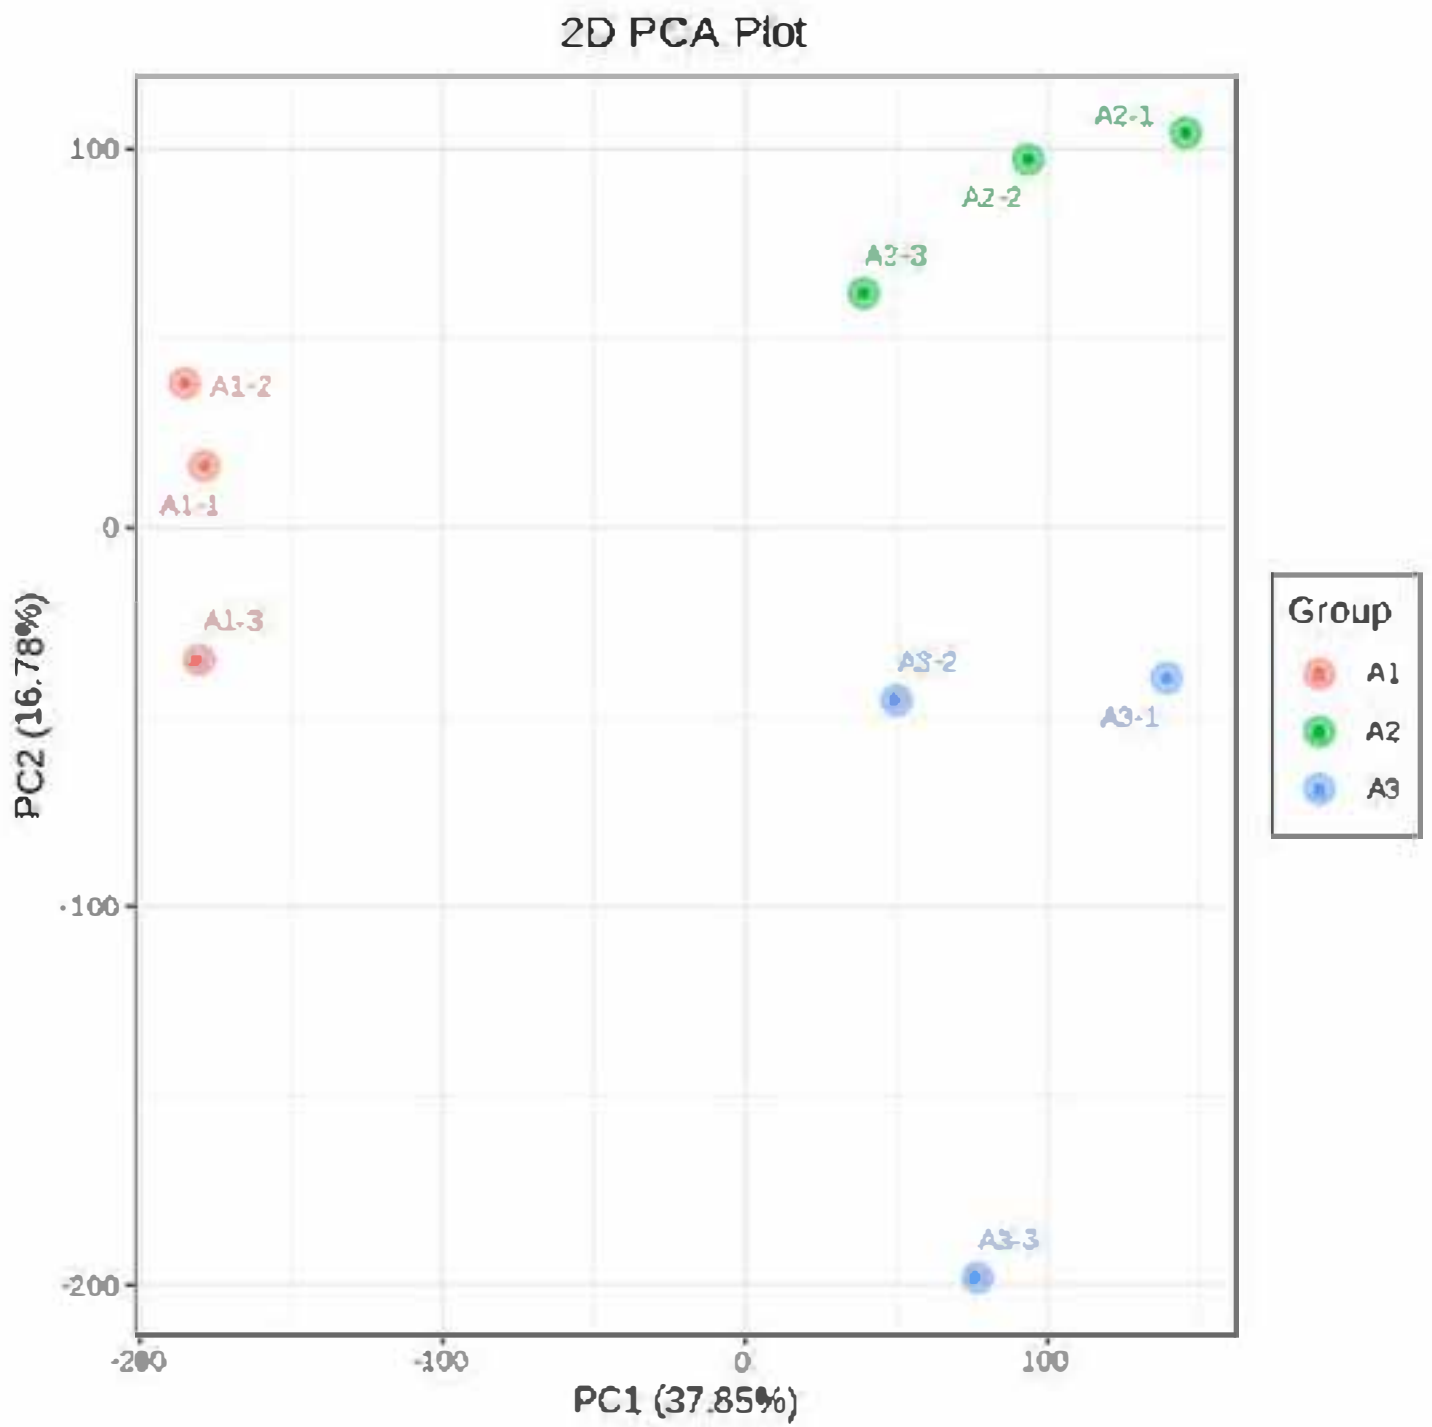

Figure 2. PCA Results.

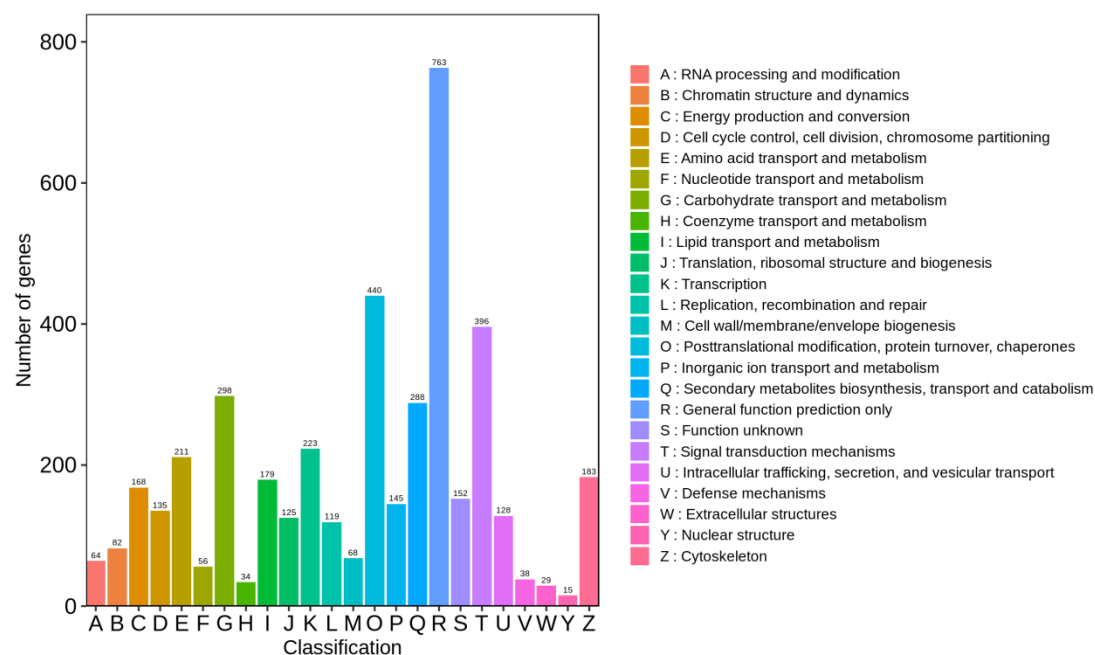

A

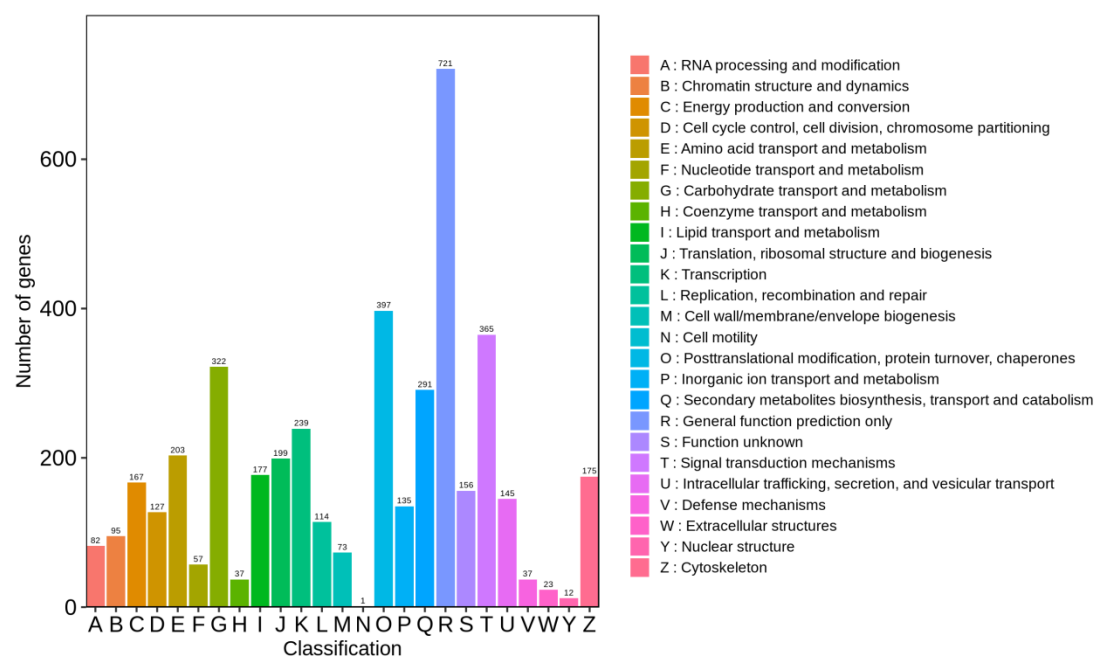

B

Figure S3. KOG function classification. A: A1-vs-A2 group, B: A1-vs-A3 group.

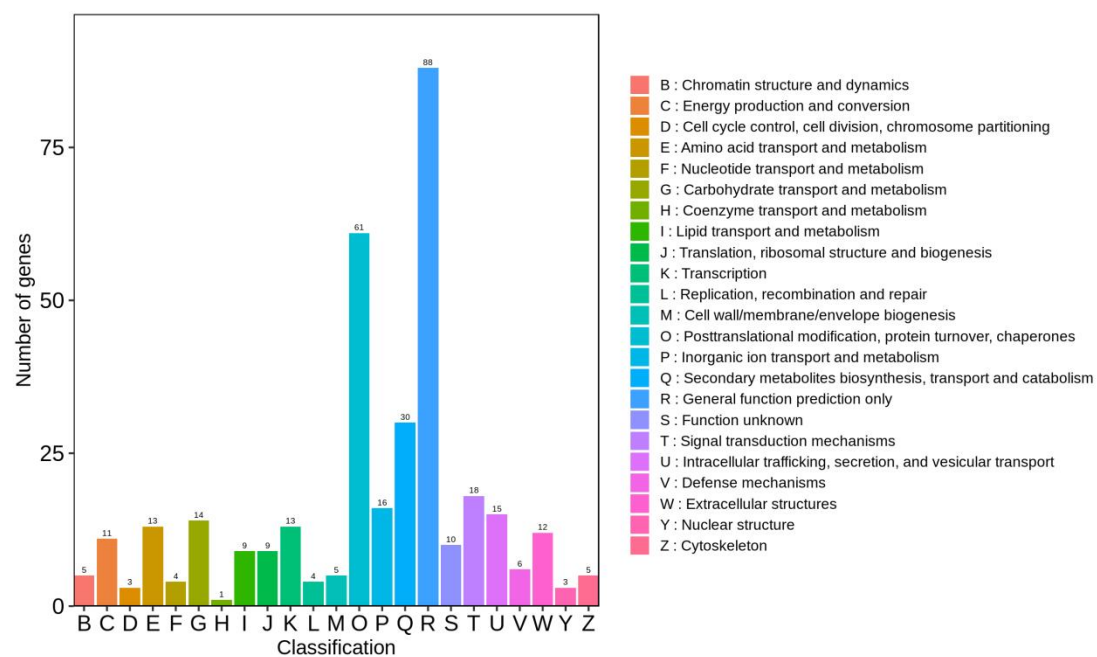

C

Figure S3 (continued). KOG function classification. C: A2-vs-A3 group.

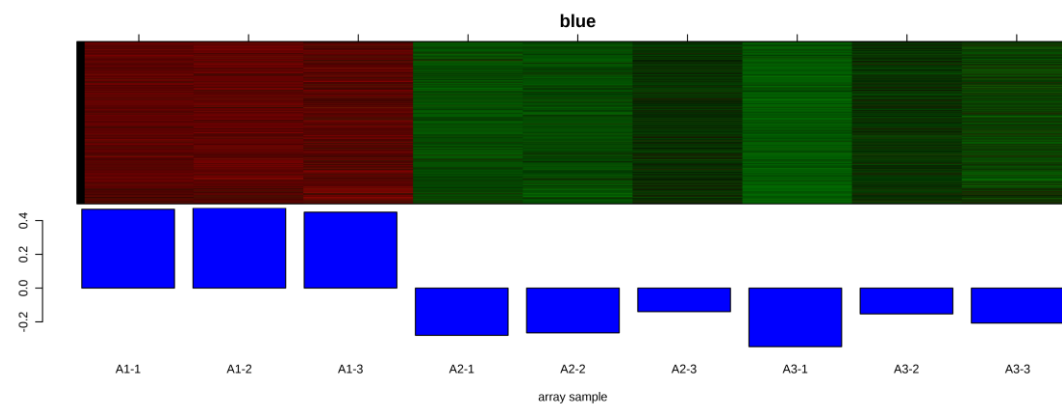

A

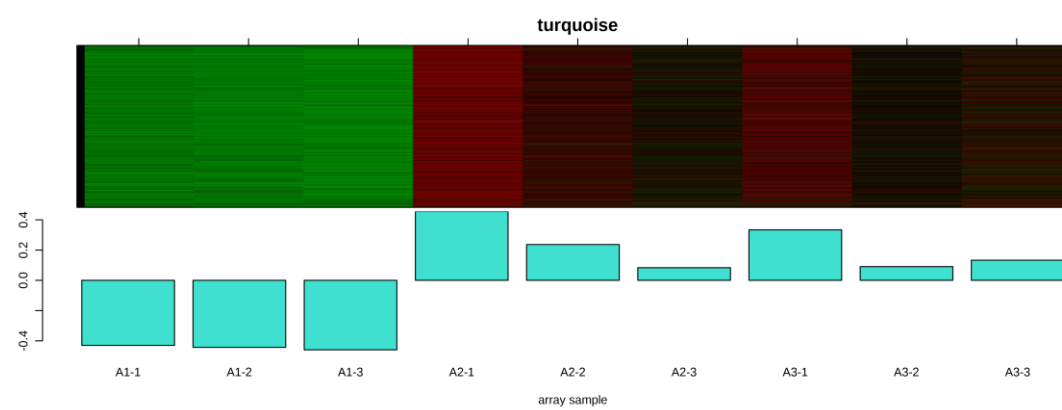

B

Figure S4. Gene expression patterns of module. A: blue module, B: turquoise module.

Table S1 Summary of mapping reads

| Sample | Total Reads | Reads mapped     | Unique mapped    | Multi mapped   | Read1 mapped     | Read2 mapped     | +' mapped        | -' mapped        |
|--------|-------------|------------------|------------------|----------------|------------------|------------------|------------------|------------------|
| A1-1   | 48925570    | 42133081(86.12%) | 37789721(77.24%) | 4343360(8.88%) | 18925666(38.68%) | 18864055(38.56%) | 18898298(38.63%) | 18891423(38.61%) |
| A1-2   | 42941472    | 36689365(85.44%) | 32836391(76.47%) | 3852974(8.97%) | 16437056(38.28%) | 16399335(38.19%) | 16404495(38.20%) | 16431896(38.27%) |
| A1-3   | 56000682    | 48206282(86.08%) | 43352020(77.41%) | 4854262(8.67%) | 21742258(38.82%) | 21609762(38.59%) | 21673949(38.70%) | 21678071(38.71%) |
| A2-1   | 44705082    | 38288174(85.65%) | 34249642(76.61%) | 4038532(9.03%) | 17243811(38.57%) | 17005831(38.04%) | 17110315(38.27%) | 17139327(38.34%) |
| A2-2   | 39678378    | 34330905(86.52%) | 30739704(77.47%) | 3591201(9.05%) | 15482776(39.02%) | 15256928(38.45%) | 15354938(38.70%) | 15384766(38.77%) |
| A2-3   | 47810308    | 41439870(86.68%) | 37076597(77.55%) | 4363273(9.13%) | 18566492(38.83%) | 18510105(38.72%) | 18537285(38.77%) | 18539312(38.78%) |
| A3-1   | 53666032    | 46774527(87.16%) | 41804174(77.90%) | 4970353(9.26%) | 20890849(38.93%) | 20913325(38.97%) | 20907898(38.96%) | 20896276(38.94%) |
| A3-2   | 40353668    | 34501400(85.50%) | 30831965(76.40%) | 3669435(9.09%) | 15433142(38.24%) | 15398823(38.16%) | 15408409(38.18%) | 15423556(38.22%) |
| A3-3   | 45718786    | 39316087(86.00%) | 35204508(77.00%) | 4111579(8.99%) | 17596121(38.49%) | 17608387(38.51%) | 17596121(38.49%) | 17608387(38.51%) |

Table S2. GO GESA in A1 vs A2

| NAME                                                                            | GO ID      | SIZE | ES          | NES         |
|---------------------------------------------------------------------------------|------------|------|-------------|-------------|
| LOCOMOTION                                                                      | GO:0040011 | 147  | 0.5552808   | 1.4334292   |
| NUTRIENT RESERVOIR ACTIVITY                                                     | GO:0045735 | 23   | 0.35643333  | 1.401939    |
| IMMUNE SYSTEM PROCESS                                                           | GO:0002376 | 785  | 0.29166946  | 1.3217136   |
| GENERAL TRANSCRIPTION INITIATION FACTOR<br>ACTIVITY                             | GO:0140223 | 15   | 0.6065685   | 1.2432882   |
| BIOLOGICAL PROCESS INVOLVED IN INTERSPECIES<br>INTERACTION BETWEEN ORGANISMS    | GO:0044419 | 2758 | 0.21960965  | 1.2134597   |
| PROTEIN TAG                                                                     | GO:0031386 | 20   | 0.35082665  | 0.96741635  |
| CARBON UTILIZATION                                                              | GO:0015976 | 25   | 0.22502321  | 0.81640565  |
| TOXIN ACTIVITY                                                                  | GO:0090729 | 52   | -0.666831   | -1.8551861  |
| MOLECULAR FUNCTION REGULATOR                                                    | GO:0098772 | 1264 | -0.35258442 | -1.7536683  |
| ANTIOXIDANT ACTIVITY                                                            | GO:0016209 | 222  | -0.42529437 | -1.6953052  |
| MOLECULAR CARRIER ACTIVITY                                                      | GO:0140104 | 90   | -0.40299073 | -1.6599253  |
| GROWTH                                                                          | GO:0040007 | 1474 | -0.37189227 | -1.636863   |
| BIOLOGICAL PROCESS INVOLVED IN<br>INTRASPECIES INTERACTION BETWEEN<br>ORGANISMS | GO:0051703 | 25   | -0.56267035 | -1.6064404  |
| REPRODUCTION                                                                    | GO:0000003 | 3870 | -0.2878866  | -1.5312333  |
| MOLECULAR TRANSDUCER ACTIVITY                                                   | GO:0060089 | 543  | -0.29972214 | -1.5247681  |
| REPRODUCTIVE PROCESS                                                            | GO:0022414 | 3844 | -0.28691363 | -1.522695   |
| TRANSPORTER ACTIVITY                                                            | GO:0005215 | 2308 | -0.2952147  | -1.4781028  |
| LOCALIZATION                                                                    | GO:0051179 | 4628 | -0.2727091  | -1.4439822  |
| SMALL MOLECULE SENSOR ACTIVITY                                                  | GO:0140299 | 33   | -0.5095702  | -1.4184793  |
| STRUCTURAL MOLECULE ACTIVITY                                                    | GO:0005198 | 828  | -0.49291703 | -1.3917829  |
| RHYTHMIC PROCESS                                                                | GO:0048511 | 408  | -0.2557086  | -1.3703744  |
| NEGATIVE REGULATION OF BIOLOGICAL PROCESS                                       | GO:0048519 | 2601 | -0.24857748 | -1.3699057  |
| BIOLOGICAL ADHESION                                                             | GO:0022610 | 49   | -0.6256175  | -1.3534654  |
| PIGMENTATION                                                                    | GO:0043473 | 60   | -0.4199764  | -1.3436227  |
| PROTEIN FOLDING CHAPERONE                                                       | GO:0044183 | 46   | -0.34417495 | -1.3112055  |
| MULTI-ORGANISM PROCESS                                                          | GO:0051704 | 955  | -0.26102254 | -1.307387   |
| SIGNALING                                                                       | GO:0023052 | 3514 | -0.22745493 | -1.2937692  |
| POSITIVE REGULATION OF BIOLOGICAL PROCESS                                       | GO:0048518 | 2670 | -0.21377203 | -1.2578028  |
| TRANSCRIPTION REGULATOR ACTIVITY                                                | GO:0140110 | 3172 | -0.22840562 | -1.2341813  |
| NITROGEN UTILIZATION                                                            | GO:0019740 | 29   | -0.33935145 | -0.983415   |
| DETOXIFICATION                                                                  | GO:0098754 | 82   | -0.21145007 | -0.86656374 |
| MOLECULAR ADAPTOR ACTIVITY                                                      | GO:0060090 | 156  | -0.16926783 | -0.8034387  |
| TRANSLATION REGULATOR ACTIVITY                                                  | GO:0045182 | 322  | -0.14082304 | -0.71667486 |

Note: SIZE represents the number of genes in the enriched gene set, ES represents enrichment ccore, NES represents normalized enrichment score.



Table S3 GO GESA in A1 vs A3

| NAME                                                                         | GO_ID      | SIZE | ES          | NES        |
|------------------------------------------------------------------------------|------------|------|-------------|------------|
| LOCOMOTION                                                                   | GO:0040011 | 147  | 0.5281227   | 1.3209519  |
| GENERAL TRANSCRIPTION INITIATION FACTOR<br>ACTIVITY                          | GO:0140223 | 15   | 0.63850564  | 1.2288884  |
| IMMUNE SYSTEM PROCESS                                                        | GO:0002376 | 785  | 0.24435487  | 1.0626987  |
| CARBON UTILIZATION                                                           | GO:0015976 | 25   | 0.2764965   | 0.96511114 |
| TRANSLATION REGULATOR ACTIVITY                                               | GO:0045182 | 322  | 0.13990986  | 0.7801411  |
| PIGMENTATION                                                                 | GO:0043473 | 60   | 0.20107378  | 0.68635267 |
| SMALL MOLECULE SENSOR ACTIVITY                                               | GO:0140299 | 33   | 0.1702684   | 0.5045698  |
| MOLECULAR FUNCTION REGULATOR                                                 | GO:0098772 | 1264 | -0.36162502 | -1.9046954 |
| TOXIN ACTIVITY                                                               | GO:0090729 | 52   | -0.61213195 | -1.4508703 |
| STRUCTURAL MOLECULE ACTIVITY                                                 | GO:0005198 | 828  | -0.5682868  | -1.441199  |
| ANTIOXIDANT ACTIVITY                                                         | GO:0016209 | 222  | -0.4403264  | -1.4134021 |
| TRANSPORTER ACTIVITY                                                         | GO:0005215 | 2308 | -0.2848857  | -1.41239   |
| BIOLOGICAL ADHESION                                                          | GO:0022610 | 49   | -0.55884176 | -1.4080366 |
| LOCALIZATION                                                                 | GO:0051179 | 4628 | -0.25530943 | -1.3951498 |
| NUTRIENT RESERVOIR ACTIVITY                                                  | GO:0045735 | 23   | -0.36377132 | -1.3544226 |
| GROWTH                                                                       | GO:0040007 | 1474 | -0.29581913 | -1.3346087 |
| MULTI-ORGANISM PROCESS                                                       | GO:0051704 | 955  | -0.27717793 | -1.3322734 |
| DETOXIFICATION                                                               | GO:0098754 | 82   | -0.42341945 | -1.2837774 |
| PROTEIN FOLDING CHAPERONE                                                    | GO:0044183 | 46   | -0.40605736 | -1.2816278 |
| REPRODUCTIVE PROCESS                                                         | GO:0022414 | 3844 | -0.25903106 | -1.2299156 |
| REPRODUCTION                                                                 | GO:0000003 | 3870 | -0.2588915  | -1.2269136 |
| TRANSCRIPTION REGULATOR ACTIVITY                                             | GO:0140110 | 3172 | -0.22647743 | -1.1751968 |
| PROTEIN TAG                                                                  | GO:0031386 | 20   | -0.4812725  | -1.1419796 |
| SIGNALING                                                                    | GO:0023052 | 3514 | -0.21156059 | -1.0940124 |
| MOLECULAR CARRIER ACTIVITY                                                   | GO:0140104 | 90   | -0.3268193  | -1.0895159 |
| MOLECULAR TRANSDUCER ACTIVITY                                                | GO:0060089 | 543  | -0.24356613 | -1.0857776 |
| BIOLOGICAL PROCESS INVOLVED IN INTRASPECIES<br>INTERACTION BETWEEN ORGANISMS | GO:0051703 | 25   | -0.43294144 | -1.0790561 |
| BIOLOGICAL PROCESS INVOLVED IN INTERSPECIES<br>INTERACTION BETWEEN ORGANISMS | GO:0044419 | 2758 | -0.20670593 | -1.0765493 |
| NEGATIVE REGULATION OF BIOLOGICAL PROCESS                                    | GO:0048519 | 2601 | -0.21006049 | -1.0076892 |
| POSITIVE REGULATION OF BIOLOGICAL PROCESS                                    | GO:0048518 | 2670 | -0.19441652 | -0.9680842 |
| MOLECULAR ADAPTOR ACTIVITY                                                   | GO:0060090 | 156  | -0.17850596 | -0.9121554 |
| RHYTHMIC PROCESS                                                             | GO:0048511 | 408  | -0.20957606 | -0.9100356 |
| NITROGEN UTILIZATION                                                         | GO:0019740 | 29   | -0.29902765 | -0.8272227 |

Table S4. GO GESA in A2 vs A2

| NAME                                                                      | GO_ID      | SIZE | ES          | NES         |
|---------------------------------------------------------------------------|------------|------|-------------|-------------|
| SMALL MOLECULE SENSOR ACTIVITY                                            | GO:0140299 | 33   | 0.6856099   | 1.5951768   |
| BIOLOGICAL ADHESION                                                       | GO:0022610 | 49   | 0.59116346  | 1.5294495   |
| GROWTH                                                                    | GO:0040007 | 1474 | 0.33081198  | 1.3127905   |
| PIGMENTATION                                                              | GO:0043473 | 60   | 0.40773982  | 1.2532766   |
| MOLECULAR CARRIER ACTIVITY                                                | GO:0140104 | 90   | 0.38360447  | 1.215418    |
| MOLECULAR TRANSDUCER ACTIVITY                                             | GO:0060089 | 543  | 0.27539077  | 1.1940435   |
| REPRODUCTION                                                              | GO:0000003 | 3870 | 0.27081585  | 1.1673399   |
| REPRODUCTIVE PROCESS                                                      | GO:0022414 | 3844 | 0.2701529   | 1.1672101   |
| NEGATIVE REGULATION OF BIOLOGICAL PROCESS                                 | GO:0048519 | 2601 | 0.2646961   | 1.1671758   |
| CARBON UTILIZATION                                                        | GO:0015976 | 25   | 0.30086786  | 1.1569184   |
| RHYTHMIC PROCESS                                                          | GO:0048511 | 408  | 0.26791164  | 1.156115    |
| POSITIVE REGULATION OF BIOLOGICAL PROCESS                                 | GO:0048518 | 2670 | 0.24145253  | 1.1181551   |
| LOCALIZATION                                                              | GO:0051179 | 4628 | 0.2111572   | 1.0818332   |
| TRANSCRIPTION REGULATOR ACTIVITY                                          | GO:0140110 | 3172 | 0.2165514   | 1.0594546   |
| MOLECULAR FUNCTION REGULATOR                                              | GO:0098772 | 1264 | 0.2176505   | 1.042795    |
| GENERAL TRANSCRIPTION INITIATION FACTOR ACTIVITY                          | GO:0140223 | 15   | 0.30996624  | 1.0406257   |
| SIGNALING                                                                 | GO:0023052 | 3514 | 0.19870324  | 0.99570453  |
| MOLECULAR ADAPTOR ACTIVITY                                                | GO:0060090 | 156  | 0.19295609  | 0.95759916  |
| MULTI-ORGANISM PROCESS                                                    | GO:0051704 | 955  | 0.18432692  | 0.86549115  |
| TRANSPORTER ACTIVITY                                                      | GO:0005215 | 2308 | 0.17868923  | 0.8318097   |
| TOXIN ACTIVITY                                                            | GO:0090729 | 52   | 0.27156582  | 0.7915285   |
| BIOLOGICAL PROCESS INVOLVED IN INTRASPECIES INTERACTION BETWEEN ORGANISMS | GO:0051703 | 25   | 0.23764025  | 0.7525019   |
| LOCOMOTION                                                                | GO:0040011 | 147  | 0.21613456  | 0.71382546  |
| DETOXIFICATION                                                            | GO:0098754 | 82   | -0.54018205 | -1.4867309  |
| PROTEIN TAG                                                               | GO:0031386 | 20   | -0.7759457  | -1.4578713  |
| ANTIOXIDANT ACTIVITY                                                      | GO:0016209 | 222  | -0.374144   | -1.4362376  |
| BIOLOGICAL PROCESS INVOLVED IN INTERSPECIES INTERACTION BETWEEN ORGANISMS | GO:0044419 | 2758 | -0.25648308 | -1.289833   |
| NUTRIENT RESERVOIR ACTIVITY                                               | GO:0045735 | 23   | -0.40581352 | -1.2604636  |
| STRUCTURAL MOLECULE ACTIVITY                                              | GO:0005198 | 828  | -0.42209563 | -1.2585585  |
| PROTEIN FOLDING CHAPERONE                                                 | GO:0044183 | 46   | -0.36608875 | -1.2307667  |
| IMMUNE SYSTEM PROCESS                                                     | GO:0002376 | 785  | -0.2239122  | -1.0185963  |
| NITROGEN UTILIZATION                                                      | GO:0019740 | 29   | -0.35718152 | -0.9718953  |
| TRANSLATION REGULATOR ACTIVITY                                            | GO:0045182 | 322  | -0.15182014 | -0.77393824 |

Table S6 Correlations between altitude and main medicinal components, and morphological characterization

| Index    | Total acylamide | Total flavonoids | Total alkaloidsa | Volatile oil | Yield   | Hundred grains mass | Normal mass | Carpopodium mass | Mass of coat-closing fruits |
|----------|-----------------|------------------|------------------|--------------|---------|---------------------|-------------|------------------|-----------------------------|
| altitude | 0.904**         | 0.935**          | 0.903**          | 0.903**      | 0.892** | 0.904**             | 0.847**     | -0.869**         | -0.844**                    |
